# Supplementary material for: Leucaena interspecific hybrid ‘KX4-Hawaii’ as a source of agricultural biomass in a water-scarce small island developing state
Source: PeerJ. 2024 Sep 26;12:e18201. doi: 10.7717/peerj.18201 (PMC11439402; doi:10.7717/peerj.18201)
Supplement: Supplemental Information 1 [file peerj-12-18201-s001.xlsx]

## Sheet: All
Entry	Date	Block	Plot	Spacing (cm)	Height (cm)	Width (cm)	Light_Intercept (%)	Green_Biomass (kg/Plant)	Woody_Biomass (kg/Plant)
1	2019-01-06	1	1	75	302.5	293	88.46	0.5	1.35
2	2019-01-06	1	2	100	290.5	272.5	72.95	0.74	1.96
3	2019-01-06	1	3	50	245.5	255	90.55	0.83	2.06
4	2019-01-06	2	4	50	200.5	268	78.03	0.22	0.56
5	2019-01-06	2	5	100	247	222	88.32	0.64	1.53
6	2019-01-06	2	6	75	247	237.5	93.45	0.57	1.07
7	2019-01-06	3	7	50	264	240.5	89.53	0.34	0.7
8	2019-01-06	3	8	75	305.5	297.5	93.66	0.98	2.31
9	2019-01-06	3	9	100	298.5	302	93.92	0.65	1.52
10	2019-01-06	4	10	75	282	266.5	93.19	0.92	2.06
11	2019-01-06	4	11	50	300	291	87.34	0.76	1.79
12	2019-01-06	4	12	100	282	282	85.69	0.56	1.28
13	2019-01-06	5	13	75	na	na	na	na	na
14	2019-01-06	5	14	50	na	na	na	na	na
15	2019-01-06	5	15	100	na	na	na	na	na
16	2019-05-02	1	1	75	164	187	81.1	0.5	0.61
17	2019-05-02	1	2	100	136.5	136.5	68.2	0.48	0.57
18	2019-05-02	1	3	50	124.5	118	77.54	0.59	0.72
19	2019-05-02	2	4	50	83	80	40.17	0.46	0.38
20	2019-05-02	2	5	100	50.5	64.5	29.87	0.55	0.55
21	2019-05-02	2	6	75	154	169	76.48	0.75	1.05
22	2019-05-02	3	7	50	121	161	67.07	0.53	0.67
23	2019-05-02	3	8	75	172	222	77.84	0.73	0.95
24	2019-05-02	3	9	100	127.5	138.5	56.89	0.68	0.82
25	2019-05-02	4	10	75	143.5	163	83.66	0.62	0.77
26	2019-05-02	4	11	50	123.5	157	65.44	0.47	0.5
27	2019-05-02	4	12	100	108.5	155.5	47.13	0.55	0.64
28	2019-05-02	5	13	75	144	175.5	66.64	0.58	0.86
29	2019-05-02	5	14	50	107.5	130.5	84.84	0.63	0.72
30	2019-05-02	5	15	100	85.5	84	60.05	0.4	0.46
31	2019-09-05	1	1	75	277.5	283	93.71	0.55	0.81
32	2019-09-05	1	2	100	253.5	275.5	68.75	0.84	1.27
33	2019-09-05	1	3	50	230.5	253	77.86	0.75	0.95
34	2019-09-05	2	4	50	158	161	84.05	0.15	0.08
35	2019-09-05	2	5	100	142	145.5	37.96	0.27	0.21
36	2019-09-05	2	6	75	276.5	274.5	81.71	0.81	1.16
37	2019-09-05	3	7	50	227	277	94.55	0.53	0.71
38	2019-09-05	3	8	75	259.5	337	96.07	1.31	2.2
39	2019-09-05	3	9	100	277.5	311	80.92	0.9	1.12
40	2019-09-05	4	10	75	267	325	91.77	0.68	0.99
41	2019-09-05	4	11	50	280	328.5	90.53	0.71	1.04
42	2019-09-05	4	12	100	247.5	293	84.98	0.91	1.23
43	2019-09-05	5	13	75	284	326.5	85.16	0.8	1.2
44	2019-09-05	5	14	50	303.5	286	89.15	0.5	0.8
45	2019-09-05	5	15	100	206	202.5	78.95	0.31	0.76
46	2020-01-10	1	1	75	213	240	84.27	0.46	0.81
47	2020-01-10	1	2	100	173	213.5	64.79	0.25	0.45
48	2020-01-10	1	3	50	174.5	193.5	79.24	0.35	0.52
49	2020-01-10	2	4	50	95.5	108	50.93	0.07	0.04
50	2020-01-10	2	5	100	108	117	29.27	0.1	0.08
51	2020-01-10	2	6	75	219.5	242.5	72.24	0.23	0.45
52	2020-01-10	3	7	50	186.5	183	na	0.2	0.34
53	2020-01-10	3	8	75	259.5	245.5	94.03	0.85	2.35
54	2020-01-10	3	9	100	195	216	58.5	0.42	0.81
55	2020-01-10	4	10	75	236.5	252	73.08	0.51	1.05
56	2020-01-10	4	11	50	213.5	214	77.96	0.24	0.47
57	2020-01-10	4	12	100	200.5	196	62.18	0.63	1.11
58	2020-01-10	5	13	75	208	199	69.88	0.54	1.11
59	2020-01-10	5	14	50	196	209	74.12	0.64	1.35
60	2020-01-10	5	15	100	180	200	59.42	0.25	0.51
